# Supplementary material for: Clinical Significance of Isolates Known to Be Blood Culture Contaminants in Pediatric Patients
Source: PubMed Central journal article supplement (PMC6843289; doi:10.3390/medicina55100696), 2019-10-17
Supplement: medicina-55-00696-s001.pdf [file medicina-55-00696-s001.pdf]

Table S1. Total Number of Isolated Species

| Isolated species                    | n (%)       | Polymicrobial infection (%) | Infection related death (%) |
|-------------------------------------|-------------|-----------------------------|-----------------------------|
| <i>Staphylococcus aureus</i>        | 227 (17.3%) | 11 (4.8%)                   | 11 (4.8%)                   |
| <i>Escherichia coli</i>             | 153 (11.6%) | 9 (5.9%)                    | 13 (8.5%)                   |
| Coagulase negative Staphylococcus   | 133 (10.1%) | 13 (9.8%)                   | 11 (8.3%)                   |
| <i>Klebsiella pneumoniae</i>        | 114 (8.7%)  | 16 (14.0%)                  | 12 (10.5%)                  |
| <i>Pseudomonas aeruginosa</i>       | 76 (5.8%)   | 4 (5.3%)                    | 17 (22.4%)                  |
| <i>Enterococcus faecium</i>         | 74 (5.6%)   | 9 (12.2%)                   | 21 (28.4%)                  |
| <i>Enterobacter cloacae</i>         | 51 (3.9%)   | 3 (5.9%)                    | 9 (17.6%)                   |
| <i>Enterococcus faecalis</i>        | 48 (3.7%)   | 11 (22.9%)                  | 0 (0.0%)                    |
| <i>Acinetobacter baumannii</i>      | 44 (3.3%)   | 4 (9.1%)                    | 19 (43.2%)                  |
| Viridans group Streptococcus        | 43 (3.3%)   | 4 (9.3%)                    | 2 (4.9%)                    |
| <i>Candida albicans</i>             | 41 (3.1%)   | 1 (2.4%)                    | 12 (29.3%)                  |
| <i>Streptococcus pneumoniae</i>     | 37 (2.8%)   | 1 (2.7%)                    | 3 (8.1%)                    |
| <i>Serratia marcescens</i>          | 22 (1.7%)   | 1 (4.5%)                    | 2 (9.1%)                    |
| <i>Candida parapsilosis</i>         | 22 (1.7%)   | 0 (0.0%)                    | 3 (13.6%)                   |
| <i>Enterobacter aerogenes</i>       | 21 (1.6%)   | 2 (9.5%)                    | 1 (4.8%)                    |
| <i>Enterococcus gallinarum</i>      | 20 (1.5%)   | 5 (25.0%)                   | 2 (10.0%)                   |
| <i>Stenotrophomonas maltophilia</i> | 19 (1.4%)   | 1 (5.3%)                    | 5 (26.3%)                   |
| Candida species, others             | 16 (1.2%)   | 1 (5.9%)                    | 2 (11.8%)                   |
| Bacillus species                    | 15 (1.2%)   | 0 (0.0%)                    | 2 (12.5%)                   |
| <i>Burkholderia cepacia</i>         | 14 (1.1%)   | 0 (0.0%)                    | 1 (7.1%)                    |
| <i>Klebsiella oxytoca</i>           | 11 (0.8%)   | 0 (0.0%)                    | 0 (0.0%)                    |
| <i>Streptococcus agalactiae</i>     | 11 (0.8%)   | 0 (0.0%)                    | 0 (0.0%)                    |
| Others                              | 101 (7.7%)  | 5 (4.5%)                    | 16 (14.3%)                  |
| Total                               | 1315        | 53 (4.0%)                   | 164 (12.5%)                 |

Table S2. Major pathogens according to underlying morbidity

| Species                           | Congenital anomaly |                         |           | Complications from preterm delivery |            |                         |           | Malignancy                        |             |                         |           |
|-----------------------------------|--------------------|-------------------------|-----------|-------------------------------------|------------|-------------------------|-----------|-----------------------------------|-------------|-------------------------|-----------|
|                                   | No.                | Polymicrobial infection | Mortality | Species                             | No.        | Polymicrobial infection | Mortality | Species                           | No.         | Polymicrobial infection | Mortality |
| <i>Staphylococcus aureus</i>      | 28 (23.9%)         | 3                       | 8         | <i>Staphylococcus aureus</i>        | 27 (13.4%) | 1                       | 8         | <i>Staphylococcus aureus</i>      | 87 (15.6%)  | 3                       | 28        |
| Coagulase negative Staphylococcus | 17 (14.5%)         | 1                       | 4         | <i>Enterococcus faecalis</i> ****   | 26 (12.9%) | 5                       | 3         | <i>Escherichia coli</i>           | 84 (15.0%)  | 5                       | 36        |
| <i>Klebsiella pneumoniae</i>      | 12 (10.3%)         | 3                       | 5         | <i>Klebsiella pneumoniae</i>        | 22 (10.9%) | 6                       | 6         | Coagulase negative Staphylococcus | 61 (10.9%)  | 7                       | 23        |
| <i>Enterococcus faecalis</i> **** | 10 (8.5%)          | 4                       | 3         | <i>Escherichia coli</i>             | 20 (9.9%)  | 2                       | 4         | <i>Klebsiella pneumoniae</i>      | 50 (8.9%)   | 3                       | 24        |
| <i>Enterococcus faecium</i>       | 7 (6.0%)           | 0                       | 1         | <i>Streptococcus agalactiae</i>     | 16 (7.9%)  | 0                       | 3         | <i>Pseudomonas aeruginosa</i>     | 41 (7.3%)   | 1                       | 23        |
| Viridans group Streptococcus      | 6 (5.1%)           | 0                       | 0         | <i>Candida albicans</i> ***         | 15 (7.4%)  | 0                       | 5         | <i>Enterococcus faecium</i>       | 39 (7.0%)   | 4                       | 22        |
| <i>Enterobacter cloacae</i>       | 6 (5.1%)           | 0                       | 0         | <i>Enterobacter cloacae</i>         | 13 (6.4%)  | 0                       | 4         | Viridans group Streptococcus      | 22 (3.9%)   | 0                       | 9         |
| <i>Candida albicans</i>           | 5 (4.3%)           | 0                       | 2         | Coagulase negative Staphylococcus   | 13 (6.4%)  | 1                       | 3         | <i>Enterobacter cloacae</i>       | 19 (3.4%)   | 3                       | 8         |
| <i>Pseudomonas aeruginosa</i>     | 5 (4.3%)           | 1                       | 4         | <i>Enterobacter aerogenes</i>       | 9 (4.5%)   | 1                       | 0         | <i>Acinetobacter baumannii</i>    | 18 (3.2%)   | 1                       | 11        |
| <i>Serratia marcescens</i>        | 4 (3.4%)           | 1                       | 0         | <i>Serratia marcescens</i>          | 9 (4.5%)   | 2                       | 3         | Bacillus species                  | 14 (2.5%)   | 1                       | 6         |
| <i>Enterobacter aerogenes</i>     | 4 (3.4%)           | 0                       | 1         | <i>Candida parapsilosis</i>         | 7 (3.5%)   | 0                       | 3         | <i>Streptococcus pneumoniae</i>   | 13 (2.3%)   | 1                       | 5         |
| Others                            | 20 (17.1%)         | 0                       | 5         | Others                              | 36 (17.8%) | 1                       | 10        | Others                            | 124 (22.2%) | 4                       | 62        |
| Total                             | 117                | 7                       | 29        | Total                               | 202        | 11                      | 50        | Total                             | 559         | 21                      | 252       |

Comparison of a certain status within a species/group was done among underlying condition. Asterisks indicate the level of statistical significance; \*p < 0.05, \*\*p < 0.01, \*\*\*p < 0.001, \*\*\*\*p < 0.0001. *Enterococcus faecalis* was isolated significantly higher in patients with congenital abnormalities and infants with complications, compared to patients with malignancy. *Candida albicans* was also isolated higher in infants with complications.
